# Supplementary material for: Telomere Maintenance Is Associated with Type 2 Diabetes Remission in Response to a Long-Term Dietary Intervention without Non-Weight Loss in Patients with Coronary Heart Disease: From the CORDIOPREV Randomized Controlled Trial
Source: MDPI journal article supplement (doi:10.3390/antiox13010125), 2024-01-19
Supplement: s1 [file s1]

**Supplementary Table S1. Comparison of Study Population versus Population Excluded for Missing Telomerase Activity.**

|                                           | <b>Population with telomerase activity data<br/>(n= 74)</b> | <b>Population without telomerase activity data<br/>(n= 109)</b> |
|-------------------------------------------|-------------------------------------------------------------|-----------------------------------------------------------------|
| <i>Responders/Non-Responders</i>          | 28/46                                                       | 45/64                                                           |
| <i>Males/Females (n)</i>                  | 63/11                                                       | 89/20                                                           |
| <i>Low-Fat diet/Mediterranean diet</i>    | 42/32                                                       | 61/48                                                           |
| <i>Age (years)</i>                        | 59 (57-61)                                                  | 61 (59-63)                                                      |
| <i>Telomere Length (ratio T/S)</i>        | 1.29 (1.11-1.47)                                            | 1.31 (1.20-1.43)                                                |
| <i>Height (m)</i>                         | 1.66 (1.64-1.67)                                            | 1.65 (1.63-1.66)                                                |
| <i>Weight (kg)</i>                        | 84.6 (81.9-87.3)                                            | 85.6 (82.7-88.5)                                                |
| <i>Body mass index (kg/m<sup>2</sup>)</i> | 30.8 (29.9-31.8)                                            | 31.4 (30.6-32.3)                                                |
| <i>Waist circumference (cm)</i>           | 105 (103-107)                                               | 106 (104-108)                                                   |
| <i>HDL-cholesterol (mmol/L)</i>           | 41 (39-44)                                                  | 42 (40-44)                                                      |
| <i>LDL-cholesterol (mmol/L)</i>           | 89 (83-95)                                                  | 10 (89-99)                                                      |
| <i>Triglycerides (mmol/L)</i>             | 140 (124-155)                                               | 144 (130-158)                                                   |
| <i>C-reactive protein (nmol/L)</i>        | 3.49 (2.50-4.49)                                            | 3.78 (2.97-4.60)                                                |
| <i>HbA1c (%)</i>                          | 6.67 (6.49-6.86)                                            | 6.70 (6.54-6.85)                                                |
| <i>Glucose (mmol/L)</i>                   | 111.9 (105.5-118.4)                                         | 109.7 (105.7-113.7)                                             |
| <i>Insulin (nmol/L)</i>                   | 11.6 (10.0-13.2)                                            | 11.9 (9.6-14.2)                                                 |
| <i>HOMA-IR</i>                            | 4.19 (3.33-5.06)                                            | 4.38 (3.75-5.03)                                                |
| <i>ISI</i>                                | 2.76 (2.40-3.130)                                           | 2.62 (2.35-2.90)                                                |
| <i>IGI</i>                                | 0.51 (0.27-0.77)                                            | 0.79 (0.47-1.13)                                                |
| <i>Hepatic-IR<sub>fasting</sub></i>       | 1723 (1376-2070)                                            | 1770 (1514-2026)                                                |
| <i>DI</i>                                 | 0.55 (0.43-0.67)                                            | 0.51 (0.46-0.57)                                                |

Values expressed as mean (95%CI). Frequencies in categorical variables. Abbreviations:

DI, Disposition Index; Hepatic-IR<sub>fasting</sub>, Hepatic Insulin Resistance Index derived from Fasting values; IGI, InsulinoGenic Index; ISI, Insulin Sensitivity Index.
