# Supplementary material for: Telomere Maintenance Is Associated with Type 2 Diabetes Remission in Response to a Long-Term Dietary Intervention without Non-Weight Loss in Patients with Coronary Heart Disease: From the CORDIOPREV Randomized Controlled Trial
Source: MDPI journal article supplement (doi:10.3390/antiox13010125), 2024-01-19
Supplement: s1 [file s1]

**Supplementary Table S2. Patients' most frequent use of medications at baseline and after the intervention.**

|                               | Baseline medication (%) |                            |                | After Intervention medication (%) |                            |                |
|-------------------------------|-------------------------|----------------------------|----------------|-----------------------------------|----------------------------|----------------|
|                               | Responders<br>N=69      | Non<br>Responders<br>N=104 | <i>p-value</i> | Responders<br>N=69                | Non<br>Responders<br>N=104 | <i>p-value</i> |
| <i>Statins</i>                | 86                      | 88                         | 0.705          | 98                                | 98                         | 0.845          |
| <i>Beta-blockers</i>          | 79                      | 81                         | 0.369          | 77                                | 79                         | 0.688          |
| <i>Anti-aggregates</i>        | 97                      | 99                         | 0.339          | 94                                | 97                         | 0.412          |
| <i>Proton pump inhibitors</i> | 89                      | 86                         | 0.550          | 79                                | 80                         | 0.882          |

Values expresses as percentage (%). Chi-square test.
